# Supplementary material
Source: Springer Nature journal article supplement (https://www.springermedizin.de/resource/supplementary/12913_2013_3035_MOESM8_ESM.pdf/9533284)

**Quote:** "Some people it would really be a problem for them to not have biscuits but it doesn't bother me and we've always eaten fresh food so, you know, just a healthy diet really and that's what we do."

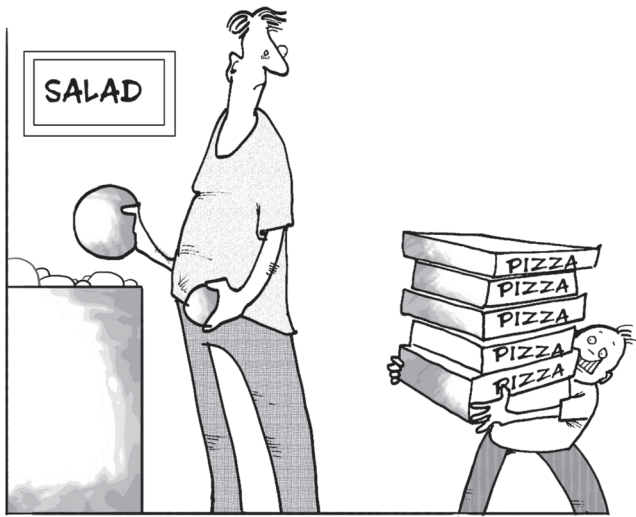

Supplement: MOESM8 [file 9533284]
